# Supplementary material for: Combinatorial In Silico Strategy towards Identifying Potential Hotspots during Inhibition of Structurally Identical HDAC1 and HDAC2 Enzymes for Effective Chemotherapy against Neurological Disorders
Source: PubMed Central journal article supplement (PMC5684606; doi:10.3389/fnmol.2017.00357), 2017-11-09
Supplement: Table1.pdf [file Table1.pdf]

**ST1.** GScore and BFE values of structurally distinct HDACi against HDAC2

| <b>HDAC Inhibitor</b> | <b>Target HDAC</b> | <b>GScore</b> | <b><math>\Delta G_{\text{binding}}</math> (kcal/mol)</b> |
|-----------------------|--------------------|---------------|----------------------------------------------------------|
| LAQ824                | HDAC2              | -10.74        | -67.7911                                                 |
| CRA-024781            |                    | -9.88         | -53.2132                                                 |
| LBH-589               |                    | -9.88         | -55.6214                                                 |
| HC-toxin              |                    | -6.64         | -79.5371                                                 |
| Valproic acid         |                    | <b>-3.61</b>  | -9.09224                                                 |
