# Supplementary material for: Combinatorial In Silico Strategy towards Identifying Potential Hotspots during Inhibition of Structurally Identical HDAC1 and HDAC2 Enzymes for Effective Chemotherapy against Neurological Disorders
Source: PubMed Central journal article supplement (PMC5684606; doi:10.3389/fnmol.2017.00357), 2017-11-09
Supplement: Table2.pdf [file Table2.pdf]

**ST2.** GScore and BFE values of structurally distinct HDACi against HDAC1

| <b>HDAC Inhibitor</b> | <b>Target HDAC</b> | <b>GScore</b> | <b><math>\Delta G_{\text{binding}}</math> (kcal/mol)</b> |
|-----------------------|--------------------|---------------|----------------------------------------------------------|
| LAQ824                | HDAC1              | -9.4          | -63.6098                                                 |
| CRA-024781            |                    | -8.7          | -40.8433                                                 |
| LBH-589               |                    | -9.51         | -54.0967                                                 |
| HC-toxin              |                    | -6.65         | -73.5482                                                 |
| Valproic acid         |                    | -2.48         | 37.09804                                                 |
